# Supplementary material for: A review of imaging techniques for systems biology
Source: Springer Nature journal article supplement (doi:10.1186/1752-0509-2-74), 2008-08-12

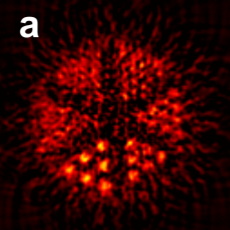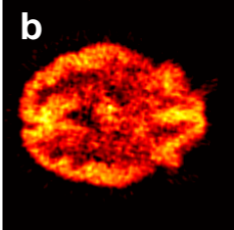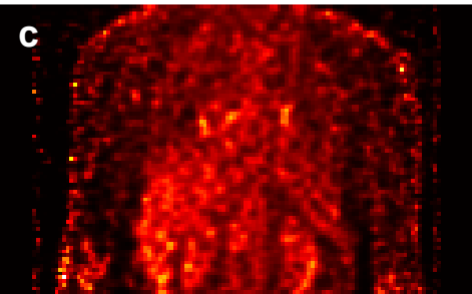

Supplement: 12918_2008_231_MOESM7_ESM.pdf [file 12918_2008_231_MOESM7_ESM.pdf]
