# Supplementary material for: A review of imaging techniques for systems biology
Source: Springer Nature journal article supplement (doi:10.1186/1752-0509-2-74), 2008-08-12

**Brightfield****Fluorescent****Overlay****Day 0**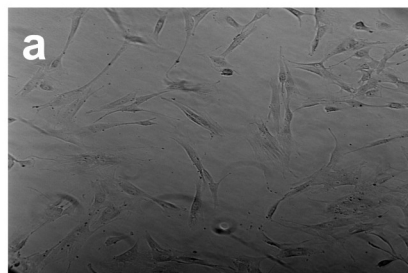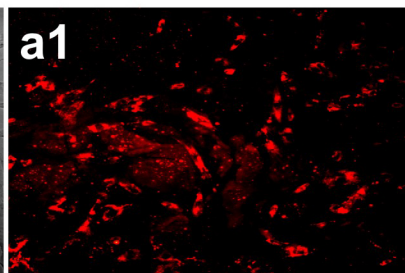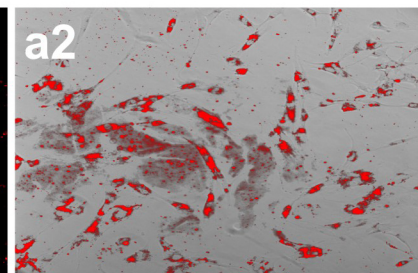**Day 4**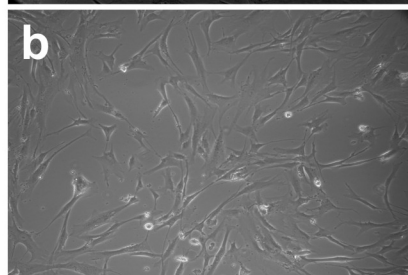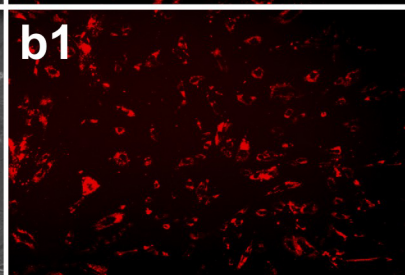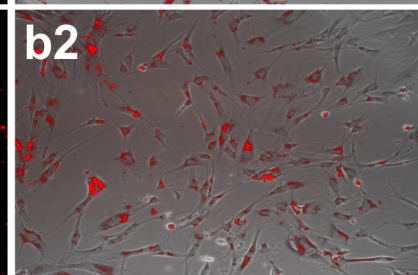**Day 7**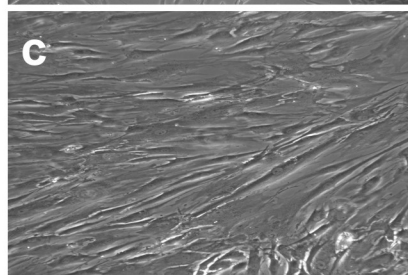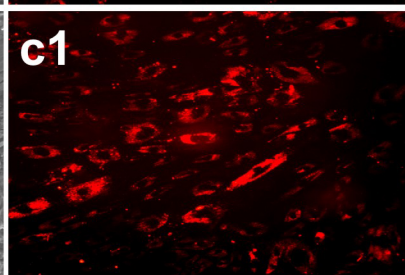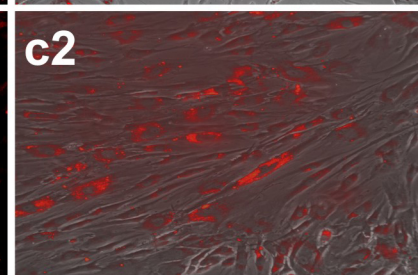**Day 22**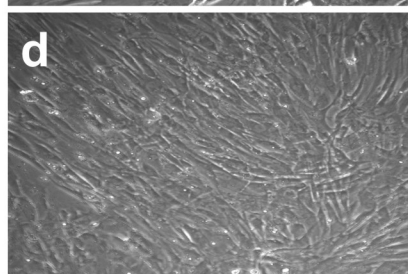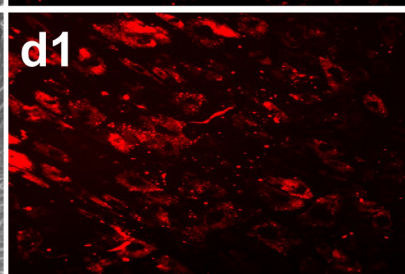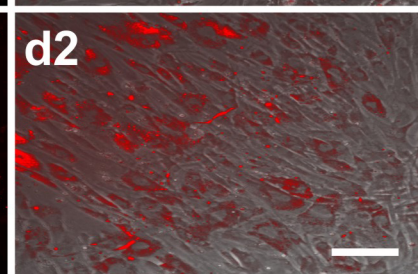**40 x**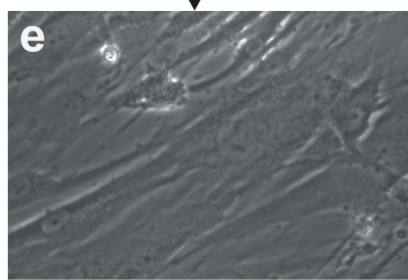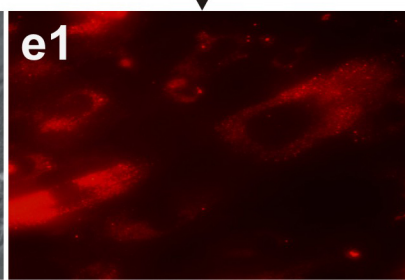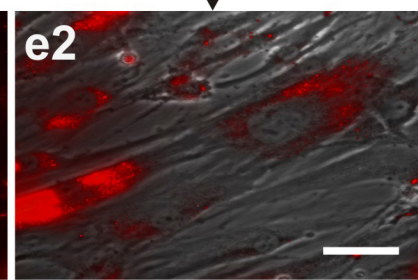

Supplement: 12918_2008_231_MOESM8_ESM.pdf [file 12918_2008_231_MOESM8_ESM.pdf]
