# Supplementary material for: A review of imaging techniques for systems biology
Source: Springer Nature journal article supplement (doi:10.1186/1752-0509-2-74), 2008-08-12
Supplement: 12918_2008_231_MOESM11_ESM.pdf [file 12918_2008_231_MOESM11_ESM.pdf]

Microscopy  
(Multi-photon, EM, AFM)

Anatomical Imaging  
(MRI, CT, Ultrasound)

Metabolic Imaging  
(fMRI, MRS, PET)

Nanometers

Micrometers

Millimeters
